# Supplementary material
Source: publisher figshare collection journal article supplement (https://sage.figshare.com/ndownloader/files/23235359)
Supplement: Supplementary file 1 [file 23235359]

## Online Supplemental Table 1

*Type and Content of Items included in Reviewed Pretrial Risk Assessment Instruments*

|                                         | COMPAS-PPRS | CPAT | ORAS-PAT | PSA | PTRA | VPRAI |
|-----------------------------------------|-------------|------|----------|-----|------|-------|
| <b>TYPES OF FACTORS</b>                 |             |      |          |     |      |       |
| Risk                                    | X           | X    | X        | X   | X    | X     |
| Protective                              |             |      |          |     |      |       |
| Static                                  | X           | X    | X        | X   | X    | X     |
| Dynamic                                 | X           | X    | X        | X   | X    | X     |
| <b>CONTENT DOMAIN</b>                   |             |      |          |     |      |       |
| <b>Demographic Characteristics</b>      |             |      |          |     |      |       |
| Age                                     | X           |      |          | X   | X    |       |
| Marital status                          |             |      |          |     |      |       |
| Citizenship                             |             |      |          |     | X    |       |
| Education                               |             |      |          |     | X    |       |
| <b>Personal/Social Characteristics</b>  |             |      |          |     |      |       |
| Living situation                        | X           | X    | X        |     | X    | X     |
| Employment                              | X           |      | X        |     | X    | X     |
| Financial resources                     |             | X    |          |     |      |       |
| Local family relationships              | X           |      |          |     |      |       |
| <b>Criminal Justice Characteristics</b> |             |      |          |     |      |       |
| Current charge                          | X           |      |          | X   | X    | X     |
| Other pending charges                   | X           | X    |          | X   | X    | X     |
| Time in community                       | X           |      |          |     |      |       |
| History of pretrial failure             | X           |      | X        | X   | X    | X     |
| Prior revoked bail or suspension        |             | X    |          |     |      |       |
| Prior misdemeanor offenses              |             |      |          | X   |      | X     |
| Prior felony offenses                   |             |      |          | X   | X    | X     |
| Prior violent convictions               |             |      |          | X   |      | X     |
| Age at first arrest                     |             | X    | X        |     |      |       |
| Prior incarceration                     | X           | X    | X        | X   |      |       |
| <b>Clinical Characteristics</b>         |             |      |          |     |      |       |
| Substance use                           | X           | X    | X        |     | X    | X     |
| Mental health                           |             | X    |          |     |      |       |

*Notes.* COMPAS-PPRS = Correctional Offender Management Profiling for Alternative Sanctions-Pretrial Risk Release Scale; CPAT = Colorado Pretrial Assessment Tool; ORAS-PAT = Ohio Risk Assessment System: Pretrial Assessment Tool; PSA = Public Safety Assessment; PTRA = Pretrial Risk Assessment Instrument; VPRAI = Virginia Pretrial Risk Assessment Instrument.

Online Supplemental Table 2

Characteristics of Studies Examining the Predictive Validity of Pretrial Risk Assessment Instruments

|                                                | Analytic Sample Size | Unit of Analysis | Jurisdictions                                  | Study Years | Offense Types                | Sample Characteristics                                                                                  | Predictor(s)                   | Subgroups Examined                         | Outcome Data Source(s) | Pretrial Outcome(s) Assessed                                | Follow-up Period(s)      | RAG EE Items Reported |
|------------------------------------------------|----------------------|------------------|------------------------------------------------|-------------|------------------------------|---------------------------------------------------------------------------------------------------------|--------------------------------|--------------------------------------------|------------------------|-------------------------------------------------------------|--------------------------|-----------------------|
| <b>COMPAS-PRRS</b>                             |                      |                  |                                                |             |                              |                                                                                                         |                                |                                            |                        |                                                             |                          |                       |
| Dieterich (2010)                               | 2,831                | person           | Kent County, FL                                | 2008        | felony                       | not reported                                                                                            | not clear                      | none                                       | official records       | FTA, felony arrest                                          | not reported             | 21                    |
| <b>CPAT</b>                                    |                      |                  |                                                |             |                              |                                                                                                         |                                |                                            |                        |                                                             |                          |                       |
| The Pretrial Justice Institute (2012)          | 1,315                | person           | 10 Colorado counties                           | unclear     | felony, misdemeanor, traffic | 76.8% male<br>85.6% White<br>11.5% Black<br>1.4% Native American<br>1.2% Asian<br>0.2% Pacific Islander | risk levels                    | none                                       | official records       | FTA, new filing (violent & non-violent)                     | up to 16-month timeframe | 26                    |
| <b>ORAS-PAT</b>                                |                      |                  |                                                |             |                              |                                                                                                         |                                |                                            |                        |                                                             |                          |                       |
| Latessa et al., (2009); Latessa, et al. (2010) | 452                  | person           | 7 Ohio counties plus some from "another state" | 2006-2009   | not specified                | 79.3% male<br>50.2% White<br>46.5% Black<br>3.3% race not specified<br>M age = 32.7                     | total scores and risk levels   | none                                       | official records       | FTA, new arrest (violent & non-violent)                     | 12 months                | 34; 23                |
| <b>PSA</b>                                     |                      |                  |                                                |             |                              |                                                                                                         |                                |                                            |                        |                                                             |                          |                       |
| DeMichele et al. (2018)                        | 164,597              | case             | statewide in Kentucky                          | 2013-2014   | not specified                | 68.9% male<br>81.1% White<br>16.8% Black<br>2.1% race not specified                                     | subscale scores, violence flag | gender (men, women)<br>race (Black, White) | official records       | FTA, new arrest (violent & non-violent), new violent arrest | not reported             | 26                    |
| Lowenkamp & VanNostrand (2013)                 | 109,633              | case             | statewide in Kentucky                          | 2009-2011   | not specified                | 74% male<br>80% White<br>18% Black<br>2% other race<br>M age = 33.5                                     | risk levels                    | none                                       | unclear                | FTA, new arrest (violent & non-violent), bail revocation    | not reported             | 20                    |

| PTRA                       |             |         |                                                      |           |                              |                                                                                                               |                                                   |                                                                                |                  |                                                                                             |                        |        |
|----------------------------|-------------|---------|------------------------------------------------------|-----------|------------------------------|---------------------------------------------------------------------------------------------------------------|---------------------------------------------------|--------------------------------------------------------------------------------|------------------|---------------------------------------------------------------------------------------------|------------------------|--------|
| Cohen & Lowenkamp (2019)   | 85,369      | unclear | federal system                                       | 2009-2015 | not specified                | 71.7% men<br>42.8% White<br>25.6% Black<br>24.2% Hispanic<br>7.4% race not specified<br>M age = 37.8          | total scores, risk levels                         | race (non-Hispanic White, non-Hispanic Black, Hispanic)<br>gender (men, women) | official records | FTA, new arrest (violent & non-violent), pretrial revocation (technical violation & arrest) | 11 months              | 34     |
| Lowenkamp & Whetzel (2009) | 200,582.50* | unclear | federal system                                       | 2001-2007 | all                          | not reported                                                                                                  | individual item scores, total scores, risk levels | none                                                                           | not reported     | FTA, new arrest (violent & non-violent), technical violation                                | not reported           | 20     |
| VPRAI                      |             |         |                                                      |           |                              |                                                                                                               |                                                   |                                                                                |                  |                                                                                             |                        |        |
| Danner et al. (2015, 2016) | 14,382      | case    | statewide in Virginia (29 pretrial service agencies) | 2013-2014 | felony, misdemeanor, traffic | 74.4% male<br>51.5% White<br>43.2% Black<br>3.6% Hispanic<br>0.1% Native American<br>1% Asian<br>M age = 32.3 | individual item scores, risk levels               | race (White, Persons of Color)<br>gender (men, women)                          | not reported     | FTA, new arrest (violent & non-violent), technical violation                                | not reported           | 25; 23 |
| Lovins & Lovins (2016)     | 568         | person  | Riverside County, CA                                 | 2014-2015 | not specified                | 71.8% male<br>36.6% White<br>63.4% Persons of Color                                                           | total scores, risk levels                         | none                                                                           | not reported     | FTA, new arrest (violent & non-violent), technical violation                                | not reported           | 21     |
| VanNosttrand (2003)        | 1,971       | person  | 7 Virginia localities                                | 1998-1999 | felony, misdemeanor          | 78.5% male<br>57.7% White<br>39.8% Black<br>2.4% race not specified                                           | total scores, risk levels                         | race (White, Black)<br>gender (men, women)<br>income                           | official records | FTA, new arrest (violent & non-violent)                                                     | up to 1 year 10 months | 29     |
| VanNost                    | 28,044      | case    | statewide                                            | 200       | felony,                      | 78% male                                                                                                      | risk                                              | none                                                                           | interview        | FTA,                                                                                        | not                    | 23     |

|                           |                                                                 |                |                 |                                                                                                      |        |                             |                                                                                    |              |
|---------------------------|-----------------------------------------------------------------|----------------|-----------------|------------------------------------------------------------------------------------------------------|--------|-----------------------------|------------------------------------------------------------------------------------|--------------|
| trand et<br>al.<br>(2011) | e in<br>Virginia<br>(30<br>pretrial<br>service<br>agencies<br>) | 5-<br>200<br>8 | misdeme<br>anor | 46%<br>White<br>48%<br>Black<br>4.5%<br>Hispanic<br>1.5% race<br>not<br>specified<br>M age =<br>32.0 | levels | ew<br>with<br>defen<br>dant | new<br>arrest<br>(violent<br>& non-<br>violent),<br>technic<br>al<br>violatio<br>n | report<br>ed |
|---------------------------|-----------------------------------------------------------------|----------------|-----------------|------------------------------------------------------------------------------------------------------|--------|-----------------------------|------------------------------------------------------------------------------------|--------------|

---

Notes. COMPAS-PPRS = Correctional Offender Management Profiling for Alternative Sandctions-Pretrial Release Risk Scale; CPAT = Colorado Pretrial Assessment Tool; ORAS-PAT = Ohio Risk Assessment System-Pretrial Assessment Tool; PSA = Public Safety Assessment; PTRR = Pretrial Risk Assessment Instrument; VPRAI = Virginia Pretrial Risk Assessment Instrument. RAGEE = Risk Assessment Guidelines for Evaluation of Efficacy. FTA = failure to appear. \*Lowenkamp & Whetzel (2009) reported a range of sample sizes from 185,827 - 215,338 so we used the average of the lower end and upper end of the ra
